# Supplementary material for: Natural history of mental health competence from childhood to adolescence
Source: J Epidemiol Community Health. 2021 Aug 16;76(2):133–9. doi: 10.1136/jech-2021-216761 (PMC8762025; doi:10.1136/jech-2021-216761)
Supplement: Supplementary data [file jech-2021-216761supp001.pdf]

## Supplementary material

Supplementary Table 1. Parent reported Strengths and Difficulties Questionnaire (SDQ) items used to measure MHC in the LSAC and MCS.

| SDQ subscale                      | Item                                                                |
|-----------------------------------|---------------------------------------------------------------------|
| Prosocial behaviours scale        | Considerate of other people's feelings                              |
|                                   | Shares readily with others                                          |
|                                   | Helpful if someone is hurt, upset or feeling ill                    |
|                                   | Kind to younger children                                            |
|                                   | Often volunteers to help others (parents, teachers, other children) |
| Conduct problems<br>Hyperactivity | Generally obedient, usually does what adults request                |
|                                   | Sees tasks through to the end                                       |
|                                   | Thinks things out before acting                                     |

Note. Parents reported on a 3-point scale, 1=not true; 2=somewhat true; 3=certainly true. There were minor wording changes to items between child and youth waves.

Supplementary Table 2. Number and proportion (%) of participants with missing data on study variables in the LSAC (N=4983) and MCS (N=18,296).

| Variable                                     | LSAC<br>n(%) | MCS<br>n(%)  |
|----------------------------------------------|--------------|--------------|
| Mental health competence (SDQ)               |              |              |
| 4-5 years                                    | 20 (0.4%)    | 8039 (43.9%) |
| 6-7 years                                    | 683 (13.7%)  | 8069 (44.1%) |
| 10-11 years                                  | 869 (17.4%)  | 6958 (38.0%) |
| 14-15 years                                  | 1617 (32.5%) | 8865 (48.5%) |
| Sociodemographic characteristics (4-5 years) |              |              |
| Child's sex                                  | 0 (0%)       | 0 (0%)       |
| Parental education                           | 63 (1.3%)    | 3043 (16.6%) |
| Parent unemployment                          | 17 (0.3%)    | 3835 (21.0%) |
| Young maternal age at child's birth          | 2 (0.0%)     | 58 (0.3%)    |

Supplementary Table 3. Sociodemographic characteristics of participants in the LSAC (N=4,983) and MCS (N=18,296).

|                                     | LSAC<br>(N = 4,983) |        |      | MCS<br>(N = 18,296) |        |      |
|-------------------------------------|---------------------|--------|------|---------------------|--------|------|
|                                     | %                   | 95% CI |      | %                   | 95% CI |      |
| Child's sex                         |                     |        |      |                     |        |      |
| Male                                | 51.2                | 49.8   | 52.7 | 51.4                | 50.5   | 52.2 |
| Female                              | 48.8                | 47.3   | 50.2 | 48.6                | 47.8   | 49.5 |
| Parental education                  |                     |        |      |                     |        |      |
| Higher (degree level)               | 27.2                | 24.7   | 29.6 | 28.7                | 26.4   | 31.0 |
| Lower (below degree)                | 72.8                | 70.4   | 75.3 | 71.3                | 69.0   | 73.6 |
| Parent unemployment                 |                     |        |      |                     |        |      |
| Working parent                      | 87.0                | 85.7   | 88.3 | 84.7                | 83.7   | 85.8 |
| Neither parent in paid employment   | 13.0                | 11.7   | 14.3 | 15.3                | 14.2   | 16.3 |
| Young maternal age at child's birth |                     |        |      |                     |        |      |
| Over 23 years of age                | 96.0                | 95.3   | 96.8 | 79.1                | 77.8   | 80.5 |
| Equal to or less than 23 years      | 4.0                 | 3.2    | 4.7  | 20.9                | 19.5   | 22.2 |
| Lone parent                         |                     |        |      |                     |        |      |
| Partnered                           | 84.9                | 83.7   | 86.2 | 81.5                | 80.5   | 82.6 |
| Lone parent                         | 15.1                | 13.8   | 16.3 | 18.5                | 17.4   | 19.5 |
| Language background                 |                     |        |      |                     |        |      |
| English                             | 84.6                | 82.5   | 86.7 | 97.2                | 96.6   | 97.9 |
| Non-English                         | 15.4                | 13.3   | 17.5 | 2.8                 | 2.1    | 3.4  |

Supplementary Table 4. Proportion (with 95% CI) of children with high MHC from 4-5 to 14-15 years according to country and gender. Estimates corresponding to Figure 1.

| Age       | Australia |        |       |         |        |       |       |        |       | UK    |        |       |         |        |       |       |        |       |
|-----------|-----------|--------|-------|---------|--------|-------|-------|--------|-------|-------|--------|-------|---------|--------|-------|-------|--------|-------|
|           | Male      |        |       | Females |        |       | All   |        |       | Male  |        |       | Females |        |       | All   |        |       |
|           | %         | 95% CI |       | %       | 95% CI |       | %     | 95% CI |       | %     | 95% CI |       | %       | 95% CI |       | %     | 95% CI |       |
| 4-5 yrs   | 10.87     | 9.57   | 12.17 | 16.47   | 14.87  | 18.06 | 13.60 | 12.57  | 14.63 | 15.72 | 14.56  | 16.88 | 25.80   | 24.30  | 27.31 | 20.62 | 19.65  | 21.60 |
| 6-7 yrs   | 14.36     | 12.70  | 16.03 | 25.98   | 23.96  | 27.99 | 20.03 | 18.68  | 21.37 | 19.71 | 18.42  | 20.99 | 32.15   | 30.63  | 33.67 | 25.76 | 24.72  | 26.80 |
| 10-11 yrs | 15.45     | 13.78  | 17.12 | 30.23   | 28.20  | 32.25 | 22.66 | 21.28  | 24.03 | 22.60 | 21.28  | 23.92 | 35.08   | 33.57  | 36.59 | 28.67 | 27.60  | 29.74 |
| 14-15 yrs | 15.79     | 13.88  | 17.69 | 27.93   | 25.47  | 30.40 | 21.71 | 20.09  | 23.33 | 20.79 | 19.44  | 22.14 | 32.00   | 30.43  | 33.57 | 26.24 | 25.12  | 27.37 |

Supplementary Table 5. Proportion of children with high mental health competence from 4-5 to 14-15 years according to country and indicators of social disadvantage. Estimates corresponding to Figure 2.

| Group comparison                | Australia |        |       |           |        |       |             |        |       |             |        |       |
|---------------------------------|-----------|--------|-------|-----------|--------|-------|-------------|--------|-------|-------------|--------|-------|
|                                 | 4-5 years |        |       | 6-7 years |        |       | 10-11 years |        |       | 14-15 years |        |       |
|                                 | % diff    | 95% CI |       | % diff    | 95% CI |       | % diff      | 95% CI |       | % diff      | 95% CI |       |
| Lower (versus higher) education | -5.7      | -8.21  | -3.19 | -4.05     | -6.89  | -1.22 | -7.58       | -10.69 | -4.47 | -11.4       | -14.63 | -8.17 |
| Unemployed (vs employed)        | -2.87     | -5.86  | 0.12  | -2.58     | -6.6   | 1.44  | -7.18       | -11.8  | -2.55 | -7.49       | -12.19 | -2.78 |
| Younger (vs older) mother       | -7.08     | -11.04 | -3.13 | -4.24     | -10.92 | 2.44  | -8.2        | -15    | -1.4  | -0.11       | -9.62  | 9.39  |
| Group comparison                | UK        |        |       |           |        |       |             |        |       |             |        |       |
|                                 | 4-5 years |        |       | 6-7 years |        |       | 10-11 years |        |       | 14-15 years |        |       |
|                                 | % diff    | 95% CI |       | % diff    | 95% CI |       | % diff      | 95% CI |       | % diff      | 95% CI |       |
| Lower (versus higher) education | -7.93     | -10.05 | -5.81 | -7.19     | -9.44  | -4.94 | -10.99      | -13.38 | -8.6  | -8.31       | -10.6  | -6.03 |
| Unemployed (vs employed)        | -5.88     | -8.26  | -3.5  | -6.28     | -8.77  | -3.79 | -8.66       | -11.14 | -6.17 | -7.72       | -10.43 | -5.02 |
| Younger (vs older) mother       | -5.11     | -7.24  | -2.98 | -6.52     | -8.89  | -4.16 | -9.83       | -12.04 | -7.62 | -8.53       | -10.96 | -6.09 |

Supplementary Table 6. Proportion of children in each trajectory group according to country and indicators of social disadvantage. Estimates corresponding to Figure 4.

| Trajectory group          | Australia        |        |       |                             |        |       |                          |        |       |                           |        |       |
|---------------------------|------------------|--------|-------|-----------------------------|--------|-------|--------------------------|--------|-------|---------------------------|--------|-------|
|                           | Female (vs male) |        |       | Lower (vs higher) education |        |       | Unemployed (vs employed) |        |       | Younger (vs older) mother |        |       |
|                           | % diff           | 95% CI |       | % diff                      | 95% CI |       | % diff                   | 95% CI |       | % diff                    | 95% CI |       |
| Low baseline, decreasing  | -5.78            | -7.00  | -4.57 | 2.81                        | 1.77   | 3.85  | 3.35                     | 1.24   | 5.45  | 3.76                      | -0.67  | 8.20  |
| Mid baseline, decreasing  | -2.47            | -3.66  | -1.27 | 2.45                        | 1.29   | 3.60  | 2.49                     | 0.11   | 4.87  | 0.80                      | -3.32  | 4.92  |
| High baseline, decreasing | 1.68             | 0.29   | 3.07  | -0.63                       | -2.04  | 0.77  | 0.14                     | -2.75  | 3.04  | -1.09                     | -4.91  | 2.74  |
| Low baseline, stable      | -5.72            | -6.84  | -4.61 | 1.32                        | 0.16   | 2.48  | 2.53                     | 0.23   | 4.83  | 2.03                      | -2.25  | 6.31  |
| Mid baseline, stable      | 0.02             | -1.28  | 1.31  | 1.05                        | -0.21  | 2.31  | -0.06                    | -2.27  | 2.15  | -2.34                     | -6.42  | 1.74  |
| High baseline, stable     | 7.77             | 6.37   | 9.17  | -4.83                       | -6.27  | -3.39 | -4.37                    | -6.80  | -1.95 | -7.36                     | -11.08 | -3.65 |
| Low baseline, increasing  | -3.78            | -5.32  | -2.23 | 1.50                        | 0.08   | 2.92  | 2.11                     | -0.43  | 4.66  | 3.00                      | -2.07  | 8.07  |
| Mid baseline, increasing  | 4.43             | 3.13   | 5.74  | -1.15                       | -2.50  | 0.20  | -3.57                    | -5.95  | -1.18 | 3.28                      | -0.73  | 7.28  |
| High baseline, increasing | 3.85             | 3.00   | 4.71  | -2.51                       | -3.41  | -1.61 | -2.63                    | -4.05  | -1.20 | -2.08                     | -4.28  | 0.13  |

  

| Trajectory group          | UK               |        |       |                             |        |       |                          |        |       |                           |        |       |
|---------------------------|------------------|--------|-------|-----------------------------|--------|-------|--------------------------|--------|-------|---------------------------|--------|-------|
|                           | Female (vs male) |        |       | Lower (vs higher) education |        |       | Unemployed (vs employed) |        |       | Younger (vs older) mother |        |       |
|                           | % diff           | 95% CI |       | % diff                      | 95% CI |       | % diff                   | 95% CI |       | % diff                    | 95% CI |       |
| Low baseline, decreasing  | -6.03            | -6.75  | -5.31 | 3.23                        | 2.36   | 4.11  | 4.34                     | 2.86   | 5.83  | 5.77                      | 4.59   | 6.96  |
| Mid baseline, decreasing  | -2.03            | -2.84  | -1.22 | 2.89                        | 1.92   | 3.86  | 1.85                     | 0.45   | 3.25  | 3.32                      | 2.11   | 4.53  |
| High baseline, decreasing | 2.84             | 1.84   | 3.84  | -1.22                       | -2.23  | -0.21 | -0.97                    | -2.19  | 0.25  | 0.87                      | -0.25  | 1.99  |
| Low baseline, stable      | -3.58            | -4.29  | -2.88 | 2.36                        | 1.65   | 3.08  | 3.46                     | 2.38   | 4.54  | 1.94                      | 1.07   | 2.81  |
| Mid baseline, stable      | 0.26             | -0.47  | 0.99  | -0.30                       | -1.28  | 0.68  | -0.80                    | -2.12  | 0.51  | -1.14                     | -2.08  | -0.19 |
| High baseline, stable     | 7.56             | 6.79   | 8.33  | -5.02                       | -6.18  | -3.86 | -4.94                    | -6.09  | -3.78 | -4.64                     | -5.68  | -3.61 |
| Low baseline, increasing  | -4.85            | -5.93  | -3.77 | 3.12                        | 2.02   | 4.23  | 3.04                     | 1.50   | 4.58  | 0.42                      | -0.85  | 1.68  |
| Mid baseline, increasing  | 1.93             | 1.02   | 2.83  | -1.89                       | -2.87  | -0.92 | -2.63                    | -3.77  | -1.50 | -3.59                     | -4.59  | -2.58 |
| High baseline, increasing | 3.91             | 3.26   | 4.55  | -3.18                       | -4.00  | -2.35 | -3.34                    | -4.08  | -2.60 | -2.96                     | -3.66  | -2.25 |

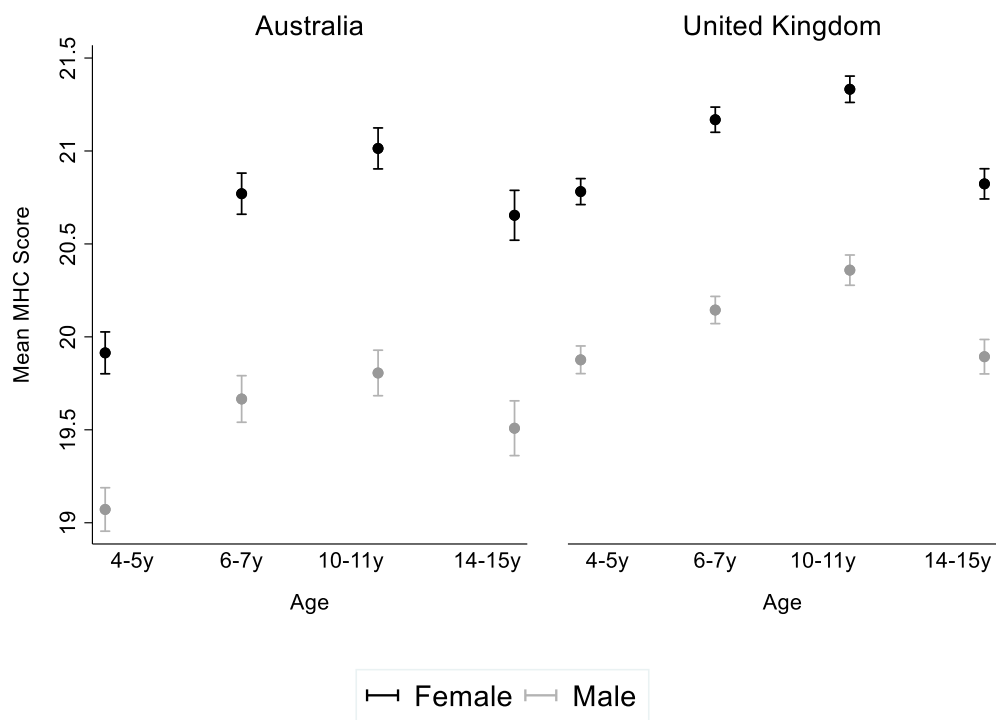

Supplementary Figure 1. Mean (95% CI) continuous MHC score from ages 4 to 15 years, according to country and gender.

## Approach to accounting for survey design in each cohort

### *Proportions of children with high MHC from 4-15 years of age*

To account for stratification in the survey design, clustering within the primary sampling unit, and survey weights, the svyset stata command was used. For example, this was implemented as `mi svyset [pweight=zweight] zpsun, strata(zstrn) singleunit(scaled)`, where the primary sampling unit (zpsun) refers to the original variables SPTN00 and pcodes in the MCS and LSAC respectively; strata (zstrn) to PTTYPE2 and stratum; and the wave 1 weighting variable (zweight) to AOVWT2 and cweight. We note that the Wave 1 weighting variable was applicable for estimates at all waves included as subsequent sample attrition was accounted for using multiple imputation. Estimates were made on a wave specific basis thus no additional adjustment for repeated measurements was required.[1]

## Approach to deriving trajectory groups to explore within individual change over time in MHC from 4-15 years

### *Additional notes on method*

Cut points at the 33<sup>rd</sup> and 66<sup>th</sup> percentile of the random slopes do not impose a direction or magnitude on the slope. For example, all tertiles may comprise of increasing slopes. However, in these data, the cut points can be interpreted as stated.

Assignment of each individual to one of the nine pre-specified trajectory groups, and estimates of the distribution of the nine trajectory groups across gender and the indicators of social disadvantage, were performed for each imputation, with results combined using Rubin's rules.

To estimate the mean intercept and change over time, and corresponding confidence interval, in each of the nine trajectory groups, we fit a random effects model between age and MHC score. Change over time was assumed to follow a linear relationship with age.

### *Stata code for trajectory models*

Code is provided below to illustrate the trajectory modelling approach and inform approaches of other researchers interested; it should not be applied without careful consideration of and validation within different data and contexts. For brevity, data cleaning and imputation steps are not presented.

```
*****
* data dictionary
*****

* ahedpn_hi:           Education level present in the household
* ahempd:              Neither parent in paid employment
* alonpn:              Lone parent
* zagepn:              Mothers age at child's birth
* zsexpn:              Child's sex
* zcounn:              Country
* mhcpd:              Mental health competency score
* agep_childage:       Child's age at assessment
* zweight:             Wave 1 population weight
* ID:                  Unique identifier for each child
* wave:                Wave identifier

*****
* DO FILE 1 - classify trajectories
*****
* Author:              Sarah Arnup
* Purpose:             This do file classifies each imputed trajectory into one of
*                      nine groups based on intercept and slope tertile,
```

```

*                               as obtained from a mixed model, with random effect
*                               for intercept and slope.
* Date:                        27 Nov 2019
* Edited:                      22 Jun 2020
*****

version 16.0
clear all

*** open data
*** data in long format

* manage data
*****
* change mi format to flong for mixed modelling
mi convert flong, clear

* trajectory modelling
*****
* set up variables needed to extract trajectory groups
forval y=1/9 {
    gen b_slope`y' = .
    gen se`y' = .
    gen intercept`y' = .

    foreach var of varlist ahedpn_hi ahempd alonpn zagepn zsexpn zcounn {
        gen mean`var'`y' = .
        gen var`var'`y' = .
    }
}

gen baseline = .
gen slope = .
gen groups = .

* obtain number of imputations
mi query
local M = r(M)

* iterate through imputations
forvalues i = 1/`M' {

    * for each imputation, obtain random effect and slope for each individual
    * include pweights at the level of the individual, not observation
    mi xeq `i': meglm mhcpd agep_childage || ID: wave, covariance(unstructured)
    pweight(zweight)

    * obtain estimates of random effects
    predict b* if _mi_m==`i', reffects

    * obtain 33rd and 66th centile of random intercept
    centile b1 if _mi_m==`i', centile(33)
    local p33 = r(c_1)
    centile b1 if _mi_m==`i', centile(66)
    local p66 = r(c_1)

    * create baseline categories for intercept based on tertile
    gen bl = 1 if b1 < `p33' & _mi_m==`i'
    replace bl = 2 if b1 < `p66' & bl==. & _mi_m==`i'
    replace bl = 3 if b1 < . & bl==. & _mi_m==`i'
    replace baseline = bl if _mi_m==`i'

    * obtain 33rd and 66th centile of random slope
    centile b2 if _mi_m==`i', centile(33)
    local p33 = r(c_1)
    centile b2 if _mi_m==`i', centile(66)
    local p66 = r(c_1)

    * create slope categories for slope based on tertile
    gen s = 1 if b2 < `p33' & _mi_m==`i'
    replace s = 2 if b2 < `p66' & s==. & _mi_m==`i'
    replace s = 3 if b2 < . & s==. & _mi_m==`i'
    replace slope = s if _mi_m==`i'

    * create 9 groupings of baseline and slope tertiles
    egen g = group(baseline slope) if _mi_m==`i'
    replace groups = g if _mi_m==`i'
}

```

```

        * drop variables needed for next iteration
        drop b? bl s g
    }

compress
save "imputed trajectories_re_groups", replace

exit

*****
* DO FILE 2 - obtain estimate of slope and intercept for each trajectory group
*****

*****
* Author:      Sarah Arnup
* Purpose:     Obtain estimate of slope and intercept for each group, with
               variance obtained using Rubin's rules.
* Date:       27 Nov 2019
* Edited:     22 June 2020
*****

* Notes:
*   Rubin's Rules:  $V_T = V_W + (1+(1/m))V_B$ 
*    $V_W = 1/m \sum (V_i)$ 
*    $V_B = (1/(m-1)) \sum (Y_i - \bar{Y})^2$ 
*    $df = (m-1) ( 1 + V_W / ((1+(1/m))V_B) )^2$ 

*   Student's T-distribution with v degrees of freedom.
*   CI  $\bar{Y} \pm t_{df}, (1-\alpha/2) \sqrt{V_T}$ 
*   increase in variance due to missing data
*    $\sqrt{V_T/V_W} - 1$ 

*****

version 16.0
clear all

* open data
use "imputed trajectories_re_groups"

* we wish to obtain an estimate of the slope in each group
* fit linear regression to each of nine groups
*****

* obtain number of imputations
mi query
local M = r(M)

* iterate through imputations
forvalues i = 1/`M' {

    * iterate through each of the 9 groups
    forval y=1/9 {

        * fit a linear regression, accounting for repeated measurements within
        individual
        regress mhcpd agep_childage if groups == `y' & _mi_m==`i', vce(cluster
        ID) noheader

        * extract intercept, beta and se for each regression
        replace b_slope`y' = _b[agep_childage] if _mi_m==`i' & groups == `y'

        replace se`y' = _se[agep_childage] if _mi_m==`i' & groups == `y'
        replace intercept`y' = _b[_cons] if _mi_m==`i' & groups == `y'

    }

}

* Obtain variances using Rubins Rules for estimate of slope in each group
*****
* "bysort ID wave:" will sum each observation over the 50 runs
* run number is given by _mi_m

* drop observed data
drop if _mi_m == 0

* create indicators

```

```

gen one = 1
bysort ID wave: egen check = total(one) // this should total the number of imputations, i.e.
50

* create mean of mhc over all imputations
bysort ID wave: egen y_imputed = mean(mhcpd) // needed for figure, isn't used further

* for each imputation (_mi_m) the regression parameters will be constant within each group
* we want to create a complete dataset with regression parameters for each group
forval y=1/9 {
    bysort _mi_m (b_slope`y'): replace b_slope`y' = b_slope`y'[1]
    bysort _mi_m (intercept`y'): replace intercept`y' = intercept`y'[1]
    bysort _mi_m (se`y'): replace se`y' = se`y'[1]
}

* create the within and between and total variance, and d.f.
forval y=1/9 {

    * create the variance of the estimate of slope
    gen var`y' = (se`y')^2

    * this is V_W: within imputation variance for each observation
    bysort ID wave: egen V_W`y' = mean(var`y')

    * create mean regression parameters for each observation for each group
    bysort ID wave: egen mean_slope`y' = mean(b_slope`y')
    bysort ID wave: egen mean_intercept`y' = mean(intercept`y') // this isn't used

    * create difference between mean and observation for slope for each observation
    gen between`y' = (b_slope`y' - mean_slope`y')^2

    * calculate V_B: between imputation variance
    bysort ID wave: egen sum_between`y' = total(between`y')
    gen V_B`y' = sum_between`y' / (check-1)

    * calculate total variance and dfs
    gen V_T`y' = V_W`y' + (1+(1/check))*V_B`y'
    gen df`y' = (check-1) * ( 1 + V_W`y' / ( ( 1+(1/check) ) * V_B`y' ) )^2
}

compress

save "imputed trajectories_trajectories", replace
exit

*****
* DO FILE 3 - Obtain estimate of the probability of being in each group,
*             given socio-demographic factor
*****

*****
* Author:      Sarah Arnup
* Purpose:     Obtain estimate of the probability of being in each group,
*             given socio-demographic factor, with variance obtained using
*             Rubin's rules as per do-file 2.
* Date:        27 Nov 2019
* Edited:      22 June 2020
*****

version 16.0
clear all

* open data
use "imputed trajectories_re_groups"

* tidy up data
*****
* drop observed data
drop if _mi_m==0

* drop unneeded variables
drop mhcpd mhcpd_hi
drop *slope* se* intercept* baseline slope agep_childage
compress

```

```

* create some indicator variables
gen one = 1
bysort ID wave: egen check = total(one)

* estimate probabilities for each group using multinomial logistic regression
* and margins
*****

* obtain number of imputations
mi query
local M = r(M)

* estimate proportion
forvalues i = 1/50 {

    * repeat for each imputation run
    preserve
        keep if _mi_m==`i'

        * repeat for each socio-demographic factor
        foreach var of varlist aheadpn_hi ahempd alonpn zagepn zsexpn {

            * run multinomial logistic regression
            mlogit groups i.`var'

            *run margins to estimate effect of factor on probability
            margins, dydx(`var')
            * extract table of estimates
            mat table1 = r(table)

            * run margins to obtain probabilities for each level of factor

in each group

            margins `var', post
            * extract table of estimates
            mat table2 = r(table)

            * extract estimates
            forval y = 1/9 {

                * extract effect estimate and variance
                local a = 9 + `y'
                replace mean_`var'`y' = table1[1,`a']
                replace var_`var'`y' = table1[2,`a']
                replace var_`var'`y' = (var_`var'`y')^2

                * extract mean and variance of probability for each

group

                local a0 = (2*`y') - 1
                local a1 = 2*`y'
                gen mean_`var'0_`y' = table2[1,`a0']
                gen mean_`var'1_`y' = table2[1,`a1']
                gen var_`var'0_`y' = table2[2,`a0']
                gen var_`var'1_`y' = table2[2,`a1']
                replace var_`var'0_`y' = (var_`var'0_`y')^2
                replace var_`var'1_`y' = (var_`var'1_`y')^2

            }

        }

    compress
    * save separate data file for each imputation
    save "imputed_trajectories_proportions_`i'",replace
restore

}

clear all

* append all imputation data files together
*****
use "imputed_trajectories_proportions_1"
    forval i=2/50 {
        append using "imputed_trajectories_proportions_`i'"
    }
    save "imputed_trajectories_proportions_1_50",replace
}

```

```

* calculate estimate and variance for each socio-demographic factor
*****
* (follows the same methodology as do-file 2)

*** REPEAT for each of the indicators: aheadpn_hi ahempd_alonpn zagepn zsexpn zcounn

* open appended data
use "imputed_trajectories_proportions_1_50", clear all

* unset data
mi unset, asis

* calculate estimate and variance as per do-file 2
foreach var of varlist aheadpn_hi {
  forval y=1/9 {
    noi di `y'
    bysort _mi_m (mean_`var'`y'): replace mean_`var'`y' = mean_`var'`y'[1]
    bysort _mi_m (var_`var'`y'): replace var_`var'`y' = var_`var'`y'[1]
    bysort ID wave: egen mean_mean_`var'`y' = mean(mean_`var'`y')
    bysort ID wave: egen mean_var_`var'`y' = mean(var_`var'`y')
    gen between_`var'`y' = (mean_mean_`var'`y' - mean_mean_`var'`y')^2
    bysort ID wave: egen sum_between_`var'`y' = total(between_`var'`y')
    gen V_B`var'`y' = sum_between_`var'`y' / (check -1)
    gen V_T`var'`y' = mean_var_`var'`y' + (1+(1/check))*V_B`var'`y'
    gen df`var'`y' = (check-1) * ( 1 + mean_var_`var'`y' / ( ( 1+(1/check) ) * V_B`var'`y'
  ) )^2

  forval x=0/1 {
    bysort _mi_m (mean_`var'`x'`y'): replace mean_`var'`x'`y' =
mean_`var'`x'`y'[1]
    bysort _mi_m (var_`var'`x'`y'): replace var_`var'`x'`y' = var_`var'`x'`y'[1]
    bysort ID wave: egen mean_mean_`var'`x'`y' = mean(mean_`var'`x'`y')
    bysort ID wave: egen mean_var_`var'`x'`y' = mean(var_`var'`x'`y')
    gen between_`var'`x'`y' = (mean_mean_`var'`x'`y' - mean_mean_`var'`x'`y')^2
    bysort ID wave: egen sum_between_`var'`x'`y' = total(between_`var'`x'`y')
    gen V_B`var'`x'`y' = sum_between_`var'`x'`y' / (check -1)
    gen V_T`var'`x'`y' = mean_var_`var'`x'`y' + (1+(1/check))*V_B`var'`x'`y'
    gen df`var'`x'`y' = (check-1) * ( 1 + mean_var_`var'`x'`y' / ( ( 1+(1/check)
  ) * V_B`var'`x'`y' ) )^2
  }
}

* tidy up data
*****
keep in 1
keep df* V_T* mean_aheadpn_hi*
gen name = 1

reshape long dfahedpn_hi dfahedpn_hi0 dfahedpn_hil_ V_Tahedpn_hi V_Tahedpn_hi0_
V_Tahedpn_hil_ mean_aheadpn_hi mean_aheadpn_hi0_ mean_aheadpn_hil_, j(wave) i(name)

* calculate confidence intervals
*****
rename mean_aheadpn_hi mean
rename V_Tahedpn_hi V_T
rename dfahedpn_hi df
rename mean_aheadpn_hi0 mean0
rename V_Tahedpn_hi0 V_T0
rename dfahedpn_hi0 df0
rename mean_aheadpn_hil mean1
rename V_Tahedpn_hil V_T1
rename dfahedpn_hil df1

gen ci = invt(df,0.975) * sqrt(V_T)
gen ci_l = mean - ci
gen ci_u = mean + ci

gen ci0 = invt(df0,0.975) * sqrt(V_T0)
gen ci_l0 = mean0 - ci0
gen ci_u0 = mean0 + ci0

gen cil = invt(df1,0.975) * sqrt(V_T1)
gen ci_l1 = mean1 - cil
gen ci_u1 = mean1 + cil

* label trajectories

```

```

rename wave trajectory
label define traj 1 "Low baseline, decreasing" ///
2 "Mid baseline, decreasing" ///
3 "High baseline, decreasing" ///
4 "Low baseline, stable" ///
5 "Mid baseline, stable" ///
6 "High baseline, stable" ///
7 "Low baseline, increasing" ///
8 "Mid baseline, increasing" ///
9 "High baseline, increasing" ///
label values trajectory traj

order name trajectory mean ci_l ci_u mean0 ci_l0 ci_u0 mean1 ci_l1 ci_u1

save "MHCproportions_ahedpn_hi", replace

exit

*****
* DO FILE 4 - construct trajectories for each group based on intercept and slope
*****

*****
* formula for line
* y1 = mean_b_slope1 * agep_childage + mean_intercept1
* 95% CI t_dfl, 1-alpha/2 * sqrt(V_T1)
* 95% CI invt(dfl,0.975) * sqrt(V_T1)

version 16.0
clear all

* open data
use "imputed_trajectories"

* keep first imputation as example 'raw' trajectories
keep if _mi_m==1

* create some dummy IDs for mean trajectory per group
count
local temp = _N + 2
set obs `temp'
replace ID = 1 if _n==_N-1
replace ID = 2 if _n==_N

* replicate one for each of 9 groups
gen replicate = 1 if ID ==1|ID==2
expand 9 if replicate==1
gsort -ID
count
replace groups = (_N - _n) + 1 in -9/-1
replace groups = (_N - _n) - 8 in -18/-10

* create variables needed for each line
forval y=1/9 {
    gen y`y'=.
    gen ci`y' = .
    gen ci_l`y' = .
    gen ci_u`y' = .
}

* set age at 3 for first point
replace agep_childage = 4*12 if ID==1
forval y=1/9 {
    replace y`y' = mean_slope`y'[1] * agep_childage + mean_intercept`y'[1] if ID==1 &
groups==`y'
}

* set age at 16 for second point
replace agep_childage = 16*12 if ID==2
forval y=1/9 {
    replace y`y' = mean_slope`y'[1] * agep_childage + mean_intercept`y'[1] if ID==2 &
groups==`y'
}

* calculate CI (very narrow)
forval y=1/9 {

```

```
      replace ci`y' = invt(df`y'[1],0.975) * sqrt(V_T`y'[1]) if (ID==1 | ID==2) &
groups==`y'
      replace ci_l`y' = y`y' - ci`y' if (ID==1 | ID==2) & groups==`y'
      replace ci_u`y' = y`y' + ci`y' if (ID==1 | ID==2) & groups==`y'
    }

    * y_imputed contains mean trajectory per groupings

  exit
```

### Supplemental references

- 1 Spittal MJ, Carlin JB, Currier D, *et al.* The Australian Longitudinal Study on Male Health sampling design and survey weighting: Implications for analysis and interpretation of clustered data. *BMC Public Health* 2016;**16**:1062.
